# Supplementary material
Source: PubMed Central journal article supplement (PMC3707544)
Supplement: supp_pp.113.220608_220608supplemental_figures.pdf [file supp_pp.113.220608_220608supplemental_figures.pdf]

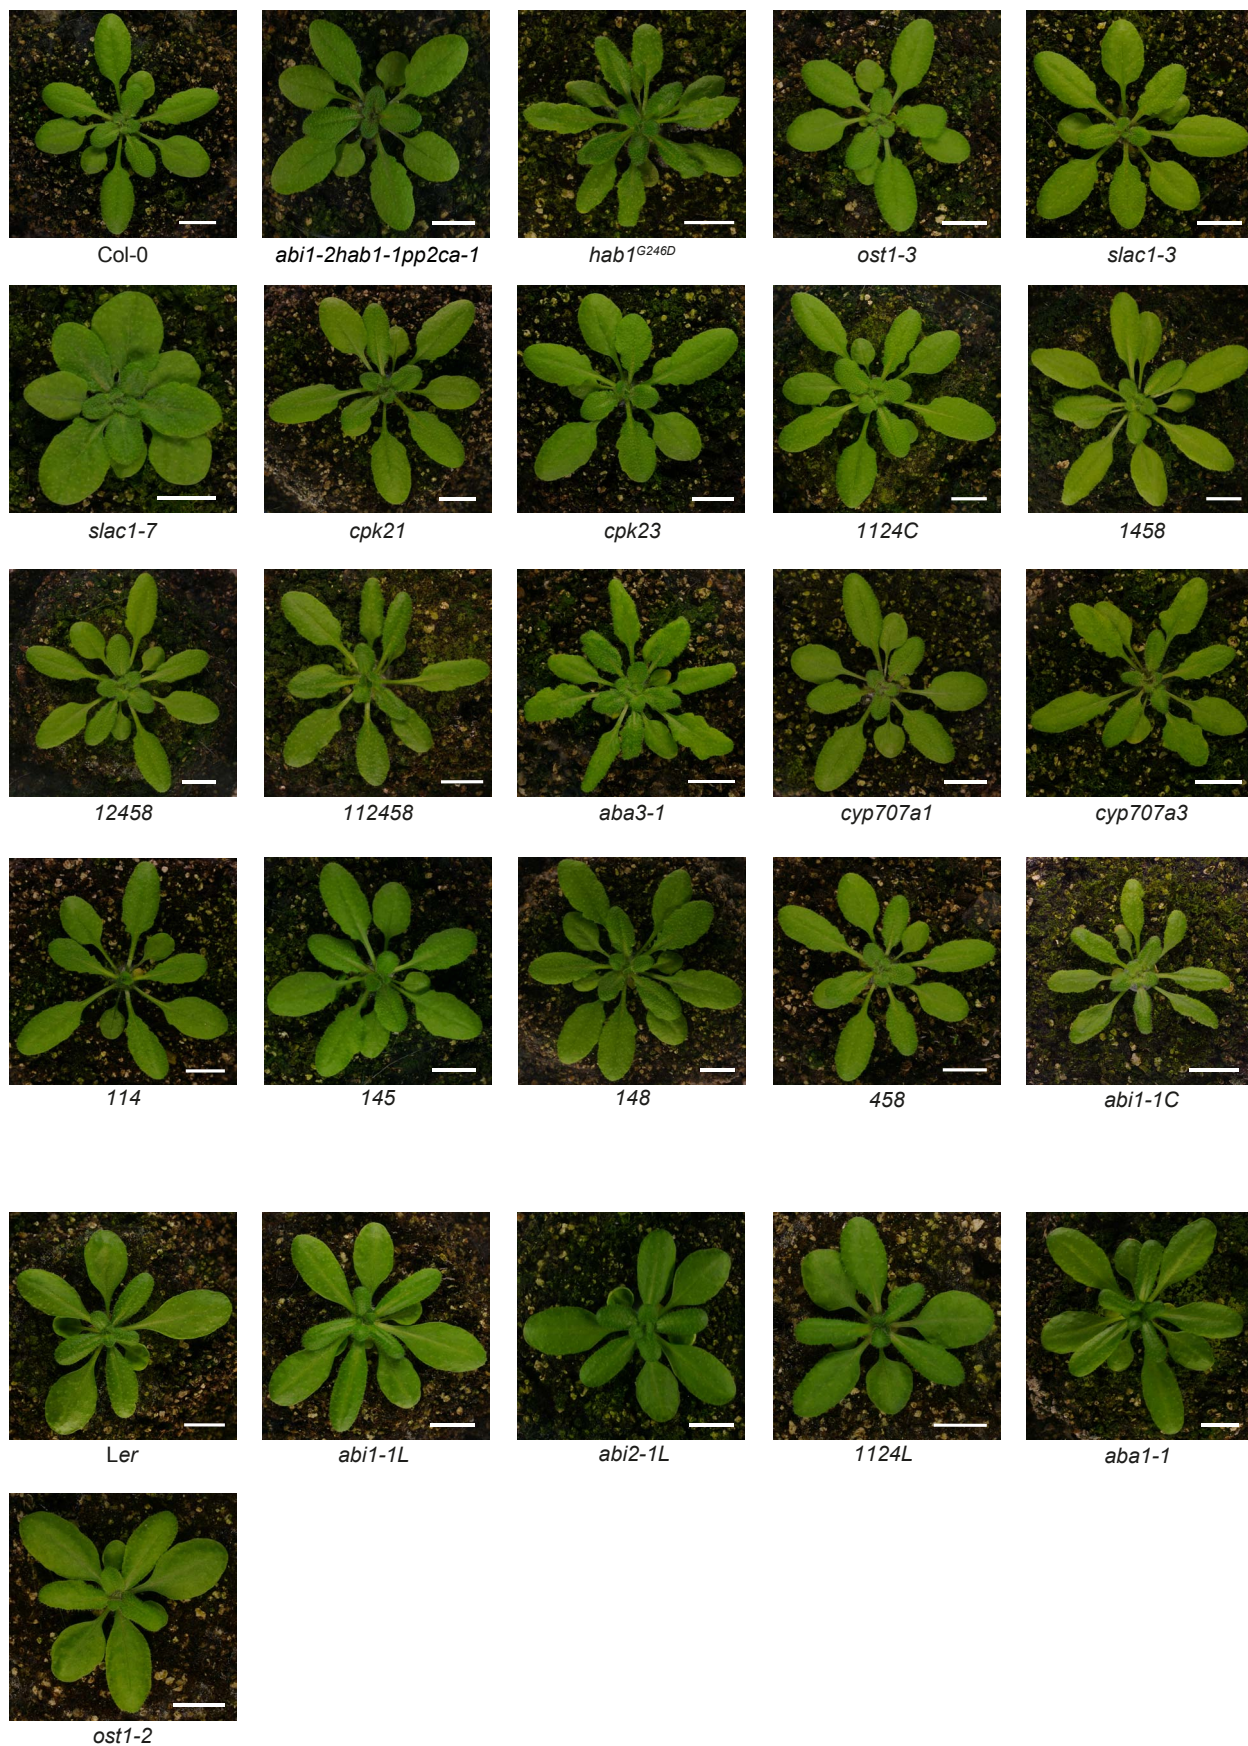

**Figure S1.** Representative photos of mutants and wild types used for whole-plant gas exchange experiments. Plants were grown through a hole in the middle of the glass plate covering growth pot as described in Kollist et al. (2007). Scale bar indicates 1 cm.

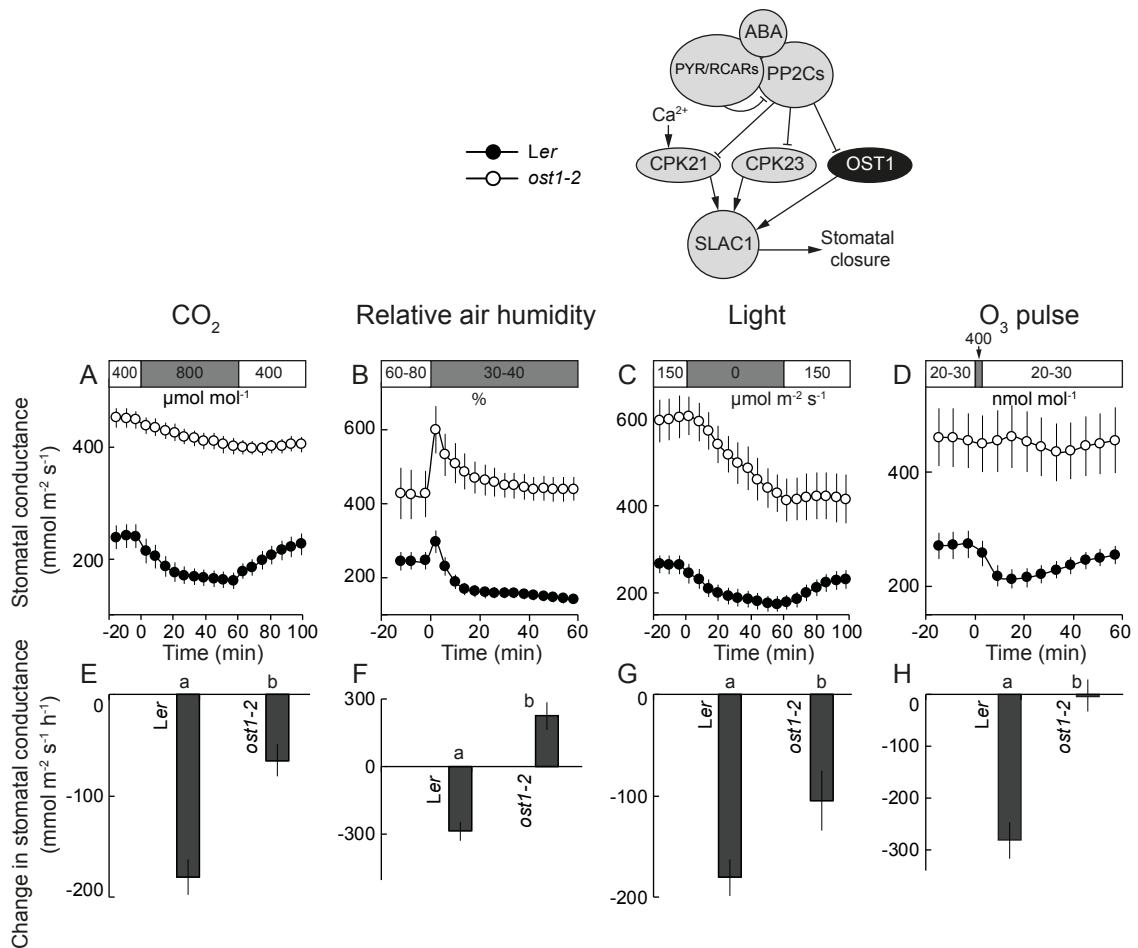

**Figure S2.** Time courses of stomatal conductances in response to elevated CO<sub>2</sub> (A), reduced air humidity (B), darkness (C) and O<sub>3</sub> pulse (D) together with corresponding changes in stomatal conductance (E, F, G, H) in the loss-of-function mutant of protein kinase OST1 and *Ler*. Significant differences ( $P < 0.05$ ,  $n = 5-13$ ) are denoted with different small letters.

### A Darkness experiment

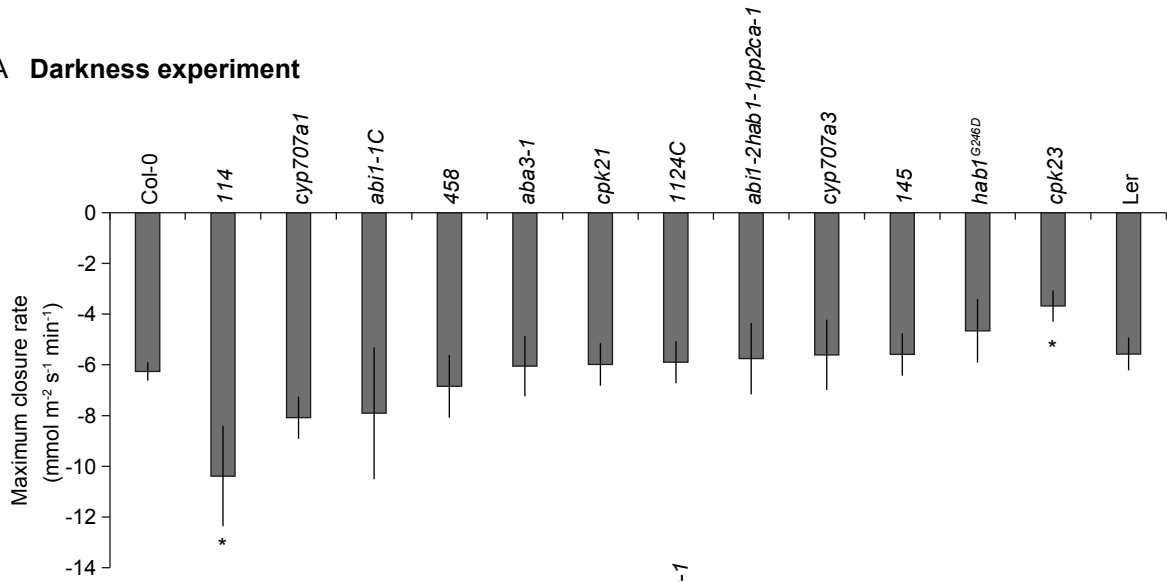

### B CO<sub>2</sub> experiment

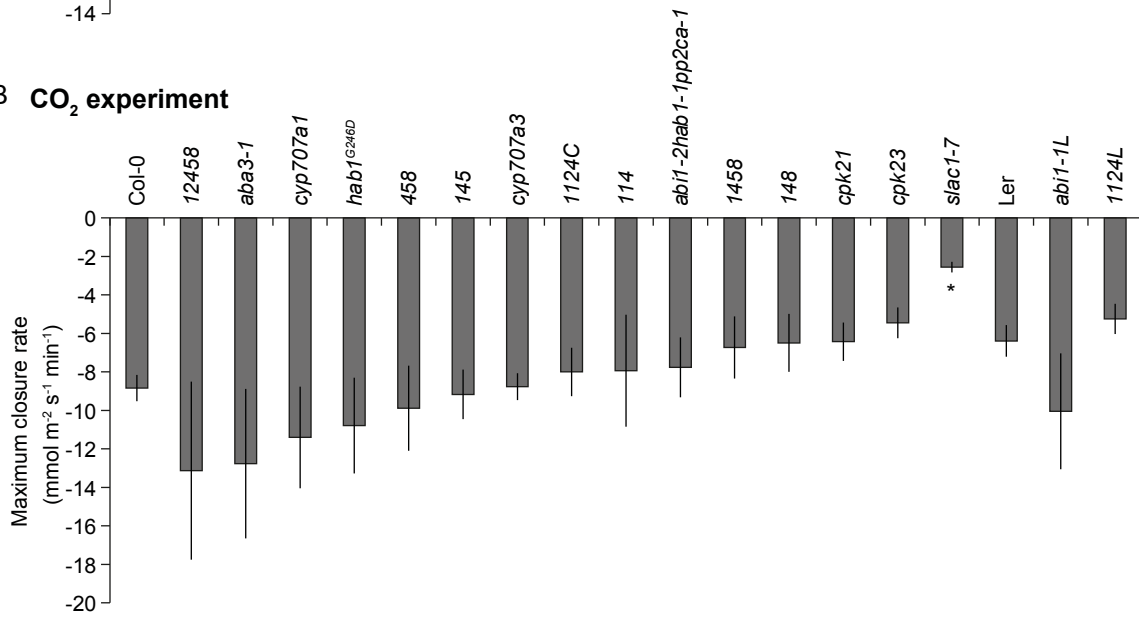

### C Humidity experiment

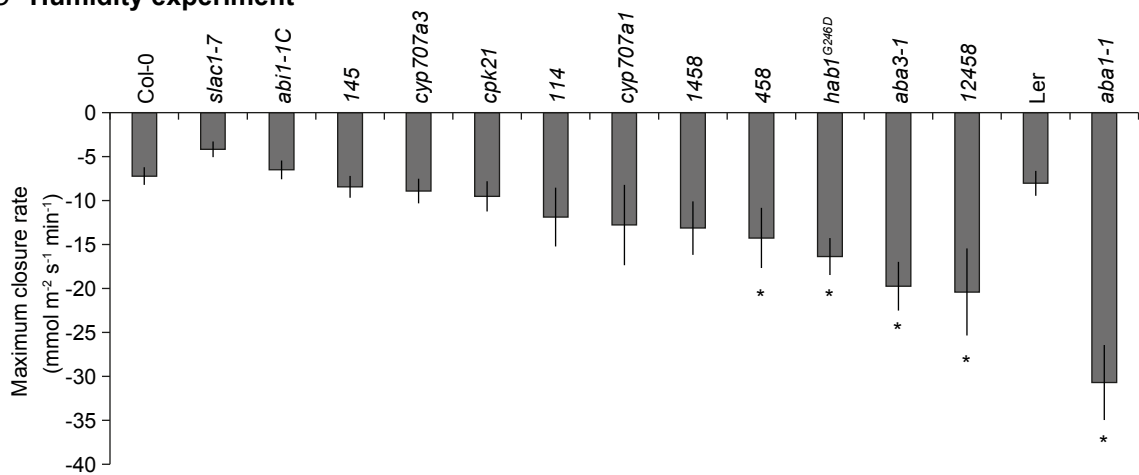

**Figure S3.** Maximum stomatal closure rates in response to darkness (A), elevated CO<sub>2</sub> (B) and reduced humidity (C) calculated using parameters of exponential fitting of stomatal closure responses.

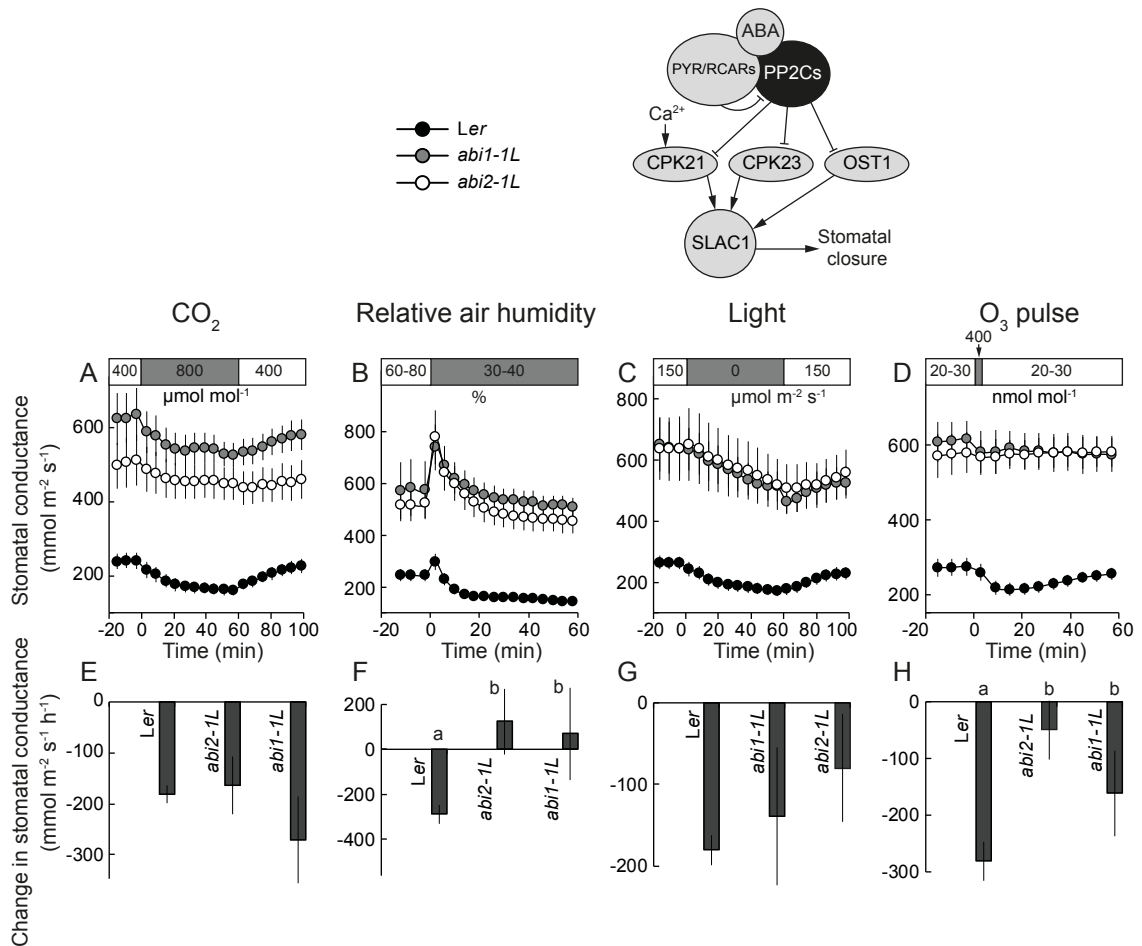

**Figure S4.** Time courses of stomatal conductances in response to elevated CO<sub>2</sub> (A), reduced air humidity (B), darkness (C) and O<sub>3</sub> pulse (D) together with corresponding changes in stomatal conductance (E, F, G, H) in dominant mutants of ABI1 and ABI2 phosphatases (*abi1-1L*, *abi2-1L*) and *Ler*. Significant differences ( $P < 0.05$ ,  $n = 6-13$ ) are denoted with different small letters.

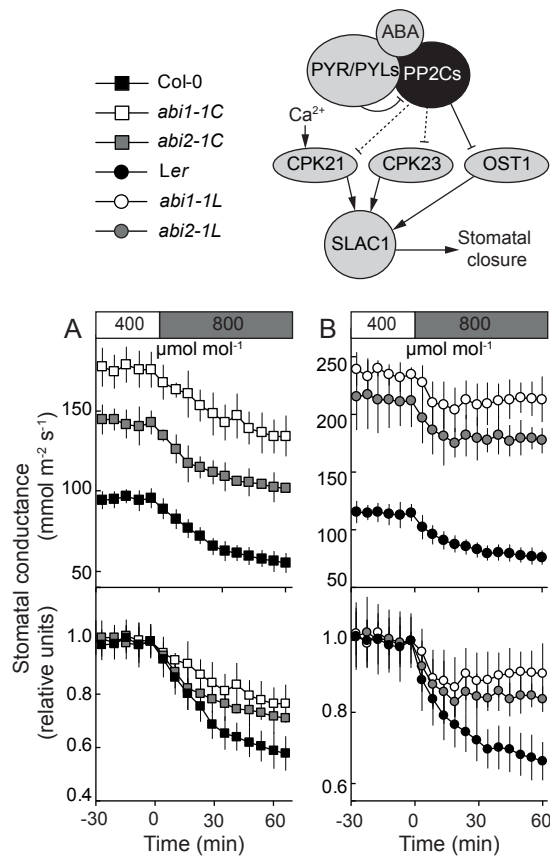

**Figure S5.** Time courses of absolute and relative leaf stomatal conductances in response to elevated CO<sub>2</sub> in plants carrying dominant *abi1-1* and *abi2-1* mutations in Col-0 (A) and Ler (B) background (n=5 for each genotype).

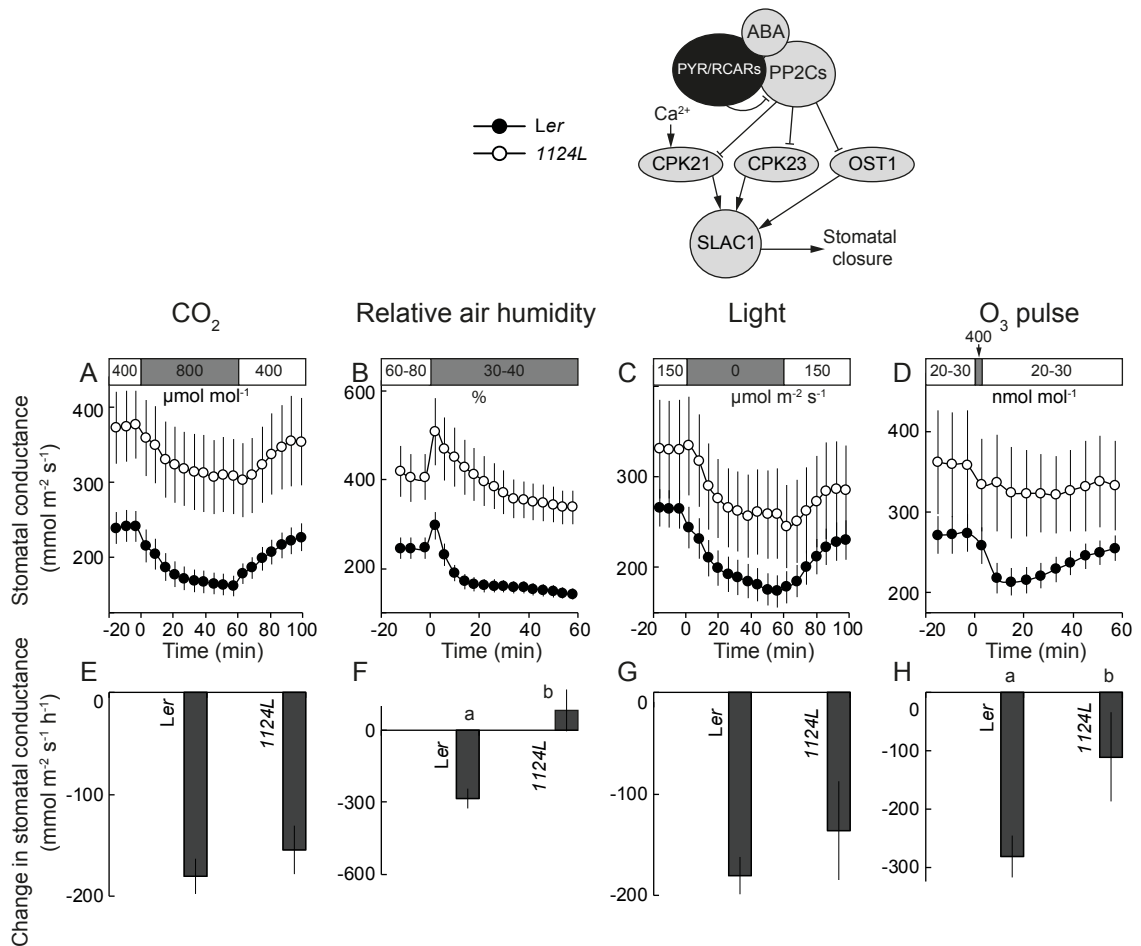

**Figure S6.** Time courses of stomatal conductances in response to elevated CO<sub>2</sub> (A), reduced air humidity (B), darkness (C) and O<sub>3</sub> pulse (D) together with corresponding changes in stomatal conductances (E, F, G, H) in quadruple loss-of-function mutant of PYR/RCAR receptor proteins, *1124L* and corresponding wildtype, *Ler*. Significant differences ( $P < 0.05$ ,  $n = 5-13$ ) are denoted with different small letters.



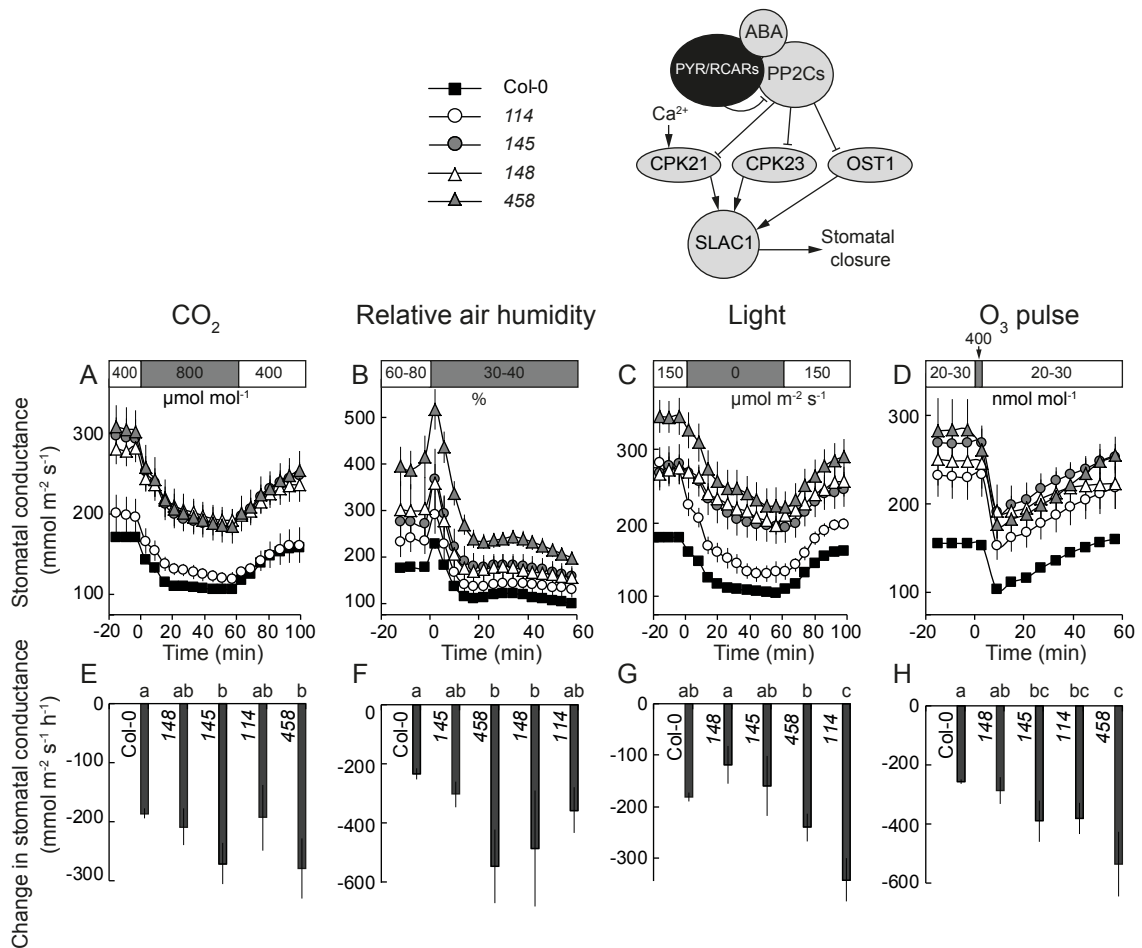

**Figure S7.** Time courses of stomatal conductances in response to elevated CO<sub>2</sub> (A), reduced air humidity (B), darkness (C) and O<sub>3</sub> pulse (D) together with corresponding changes in stomatal conductances (E, F, G, H) in triple loss-of-function mutants of PYR/RCAR receptors. Significant differences ( $P < 0.05$ ,  $n = 5-50$ ) are denoted with different small letters.

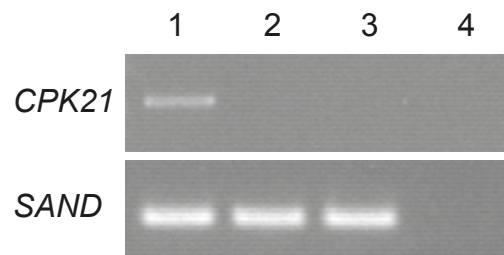

**Figure S8** The *cpk21* T-DNA mutant (GABI\_322A03) is a transcriptional knockout. RNA was isolated from wildtype and *cpk21* and used for RT-PCR with primers amplifying full length CPK21. Lane 1 wildtype, lane 2 and 3 two independent repeats of *cpk21*, lane 4 water control. The house keeping gene SAND was amplified in parallel from all samples.
